# Supplementary material
Source: PubMed Central journal article supplement (PMC3366404)
Supplement: JCI60144sd.pdf [file JCI60144sd.pdf]

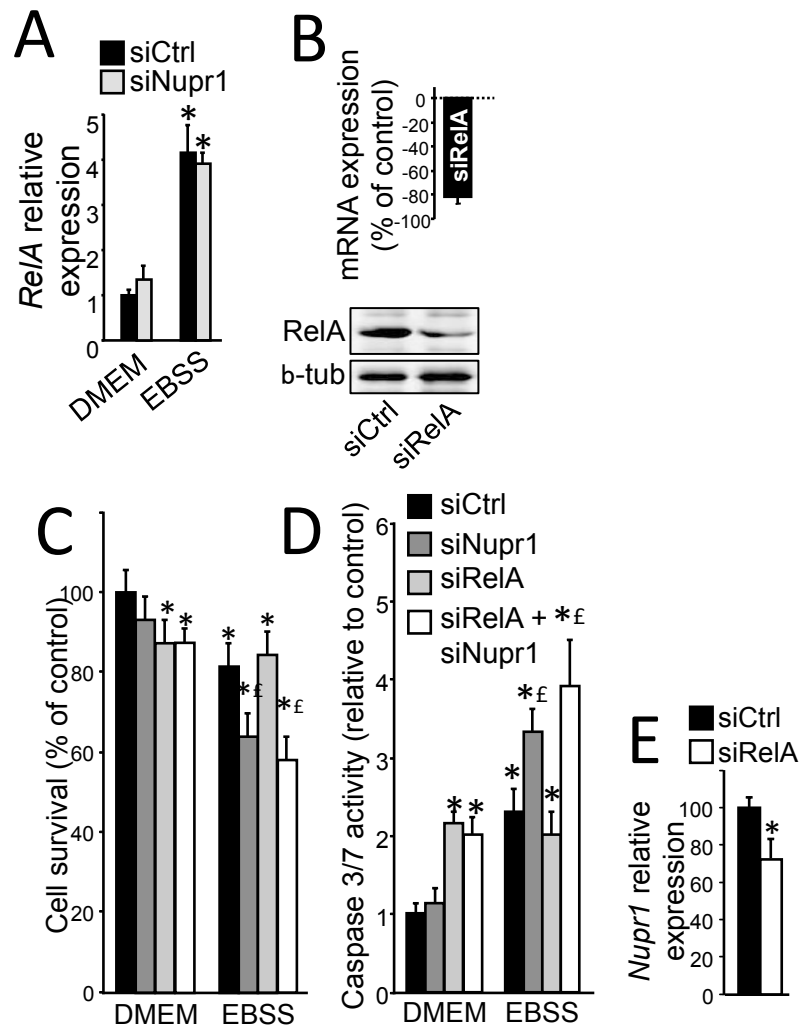

Supplementary Hamidi Fig 1

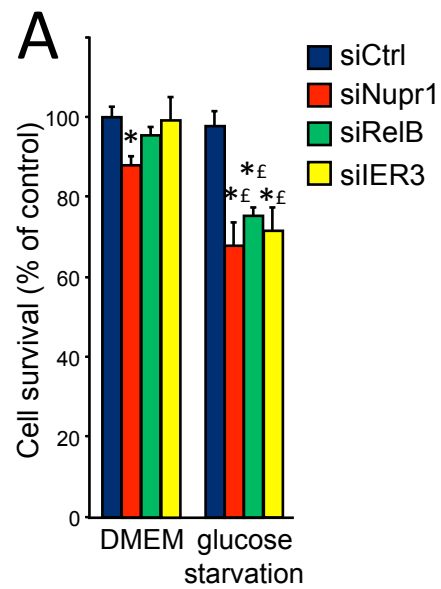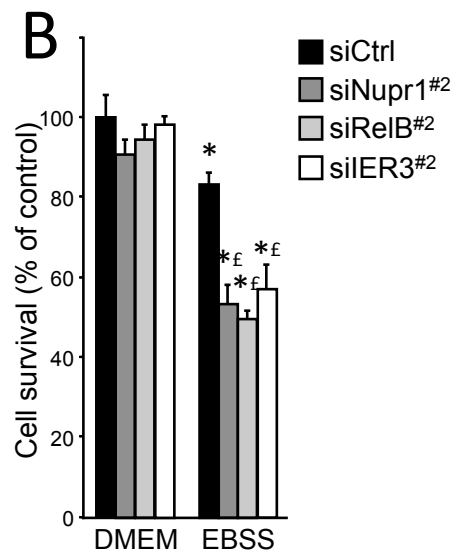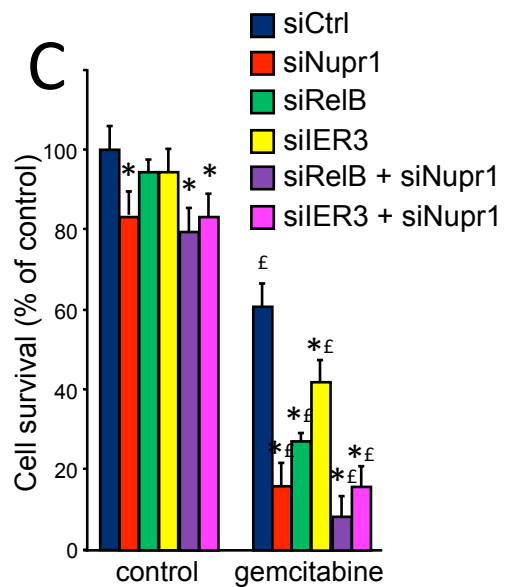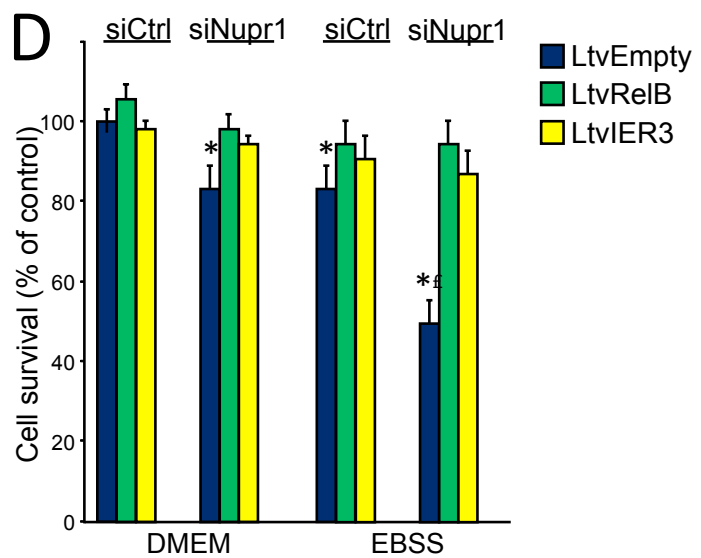

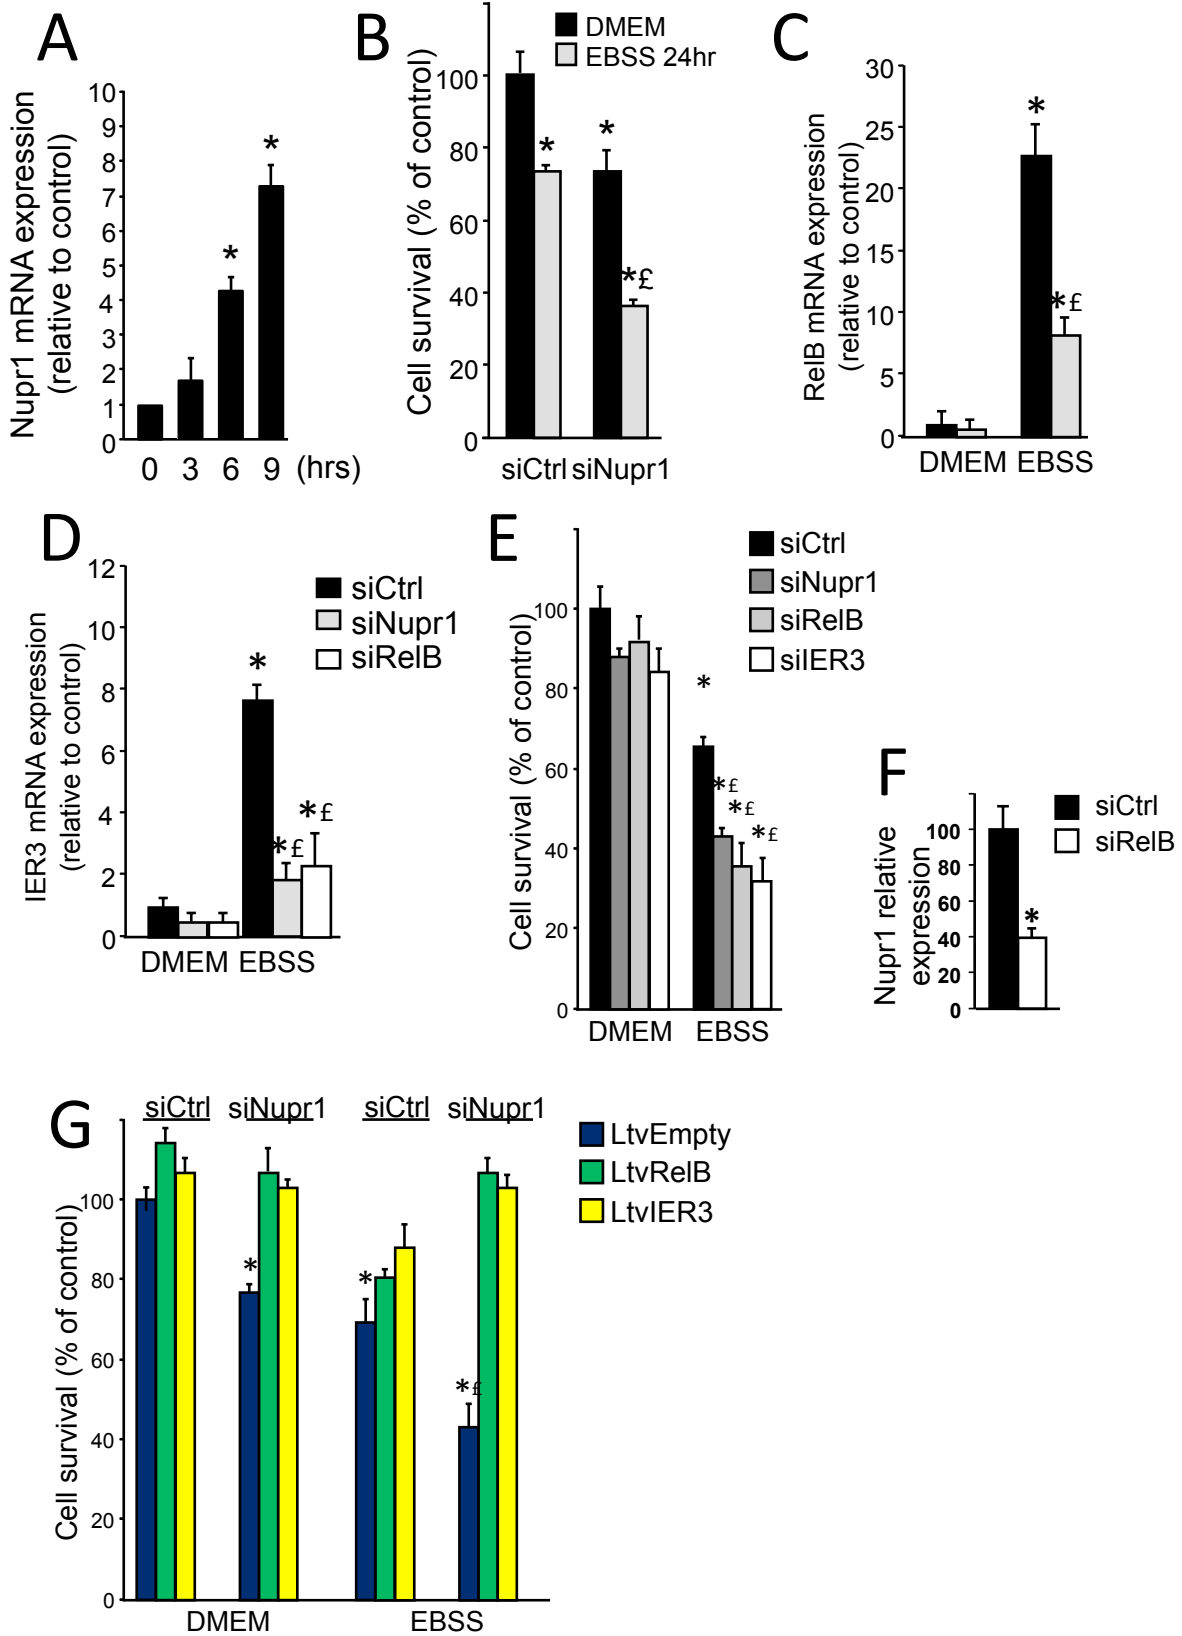

Supplementary Hamidi Fig 3

### Supplementary Table 1

Primer sequences used for Real-time PCR

| Gene        | Forward sequence            | Reverse sequence                |
|-------------|-----------------------------|---------------------------------|
| huNupr1     | 5'-TAGAGACGGGACTGCG-3'      | 5'-GCGTGTCTATTTATTGTTGC-3'      |
| huRelB      | 5'-TTGAGCGGAAGATTCAACTGG-3' | 5'-CCTGCTGGTCCCGATATGAG-3'      |
| huRelA      | 5'-TTGAGGTGTATTTACGGGACC-3' | 5'-GCACATCAGCTTGCGAAAAGG-3'     |
| huIER3      | 5'-CAGTCGAGGAACCGAACCC-3'   | 5'-GATCTGGCAGAAGACGATGGT-3'     |
| mNupr1      | 5'-CCCTTCCCAGCAACCTCTAAA-3' | 5'-TCTTGGTCCGACCTTTCCGA-3'      |
| mRelB       | 5'-ACCGGGTACACCCACATAG-3'   | 5'-CCCAGGTTGTTAAAGCTGTGC-3'     |
| mIER3       | 5'-GCTCTGGTCCCGAGATTTTCA-3' | 5'-AGATGATGGCGAACAGGAGAA-3'     |
| Cyclophilin | 5'-ATGGTCAACCCACCGTGT-3'    | 5'-TTCTTGCTGTCTTTGGAACCTTGTC-3' |

**Supplementary Table 2**

| <b>patient #</b> | <b>Nupr1</b> | <b>RelB</b> | <b>IER3</b> | <b>survival (months)</b> | <b>age</b> | <b>gender</b> |
|------------------|--------------|-------------|-------------|--------------------------|------------|---------------|
| 1                | 0.94         | 9.32        | 14.78       | >24                      | 65         | M             |
| 2                | 1.34         | 0.3         | 4.67        | >24                      | 78         | M             |
| 3                | 2.94         | 6.32        | 10.89       | >24                      | 60         | F             |
| 4                | 3.42         | 4.27        | 17.09       | 20                       | 72         | M             |
| 5                | 7.04         | 5.27        | 21.32       | 6                        | 63         | F             |
| 6                | 25.08        | 9.08        | 21.56       | 11                       | 65         | F             |
| 7                | 18.02        | 3.12        | 23.4        | 11                       | 49         | M             |
| 8                | 11.62        | 10.41       | 18.98       | >24                      | 63         | M             |
| 9                | 6.12         | 4.12        | 23.57       | >24                      | 61         | F             |
| 10               | 2.64         | 9.2         | 34.67       | 19                       | 63         | M             |
| 11               | 0.47         | 0.01        | 2.09        | >24                      | 48         | F             |
| 12               | 14.31        | 3.12        | 21.55       | 9                        | 61         | M             |
| 13               | 4.99         | 9.04        | 21.65       | >24                      | 76         | M             |
| 14               | 0.25         | 1.2         | 20.34       | 20                       | 56         | F             |
| 15               | 7.34         | 3.24        | 18.43       | 10                       | 69         | F             |
| 16               | 0.32         | 2.07        | 5.6         | 14                       | 52         | M             |
| 17               | 2.3          | 2.8         | 24.7        | 7                        | 72         | M             |
| 18               | 24.31        | 6.41        | 18.24       | 7                        | 71         | F             |
| 19               | 7.12         | 7.77        | 30.01       | 14                       | 80         | M             |
| 20               | 3.81         | 6.12        | 16.6        | 18                       | 71         | F             |
| 21               | 0.64         | 3.14        | 3.89        | 12                       | 52         | M             |
| 22               | 16.91        | 7.25        | 35.56       | 16                       | 59         | F             |
| 23               | 20.2         | 6.41        | 32.9        | 16                       | 70         | F             |
| 24               | 2.01         | 3.12        | 2.45        | 17                       | 61         | M             |
| 25               | 0.82         | 2.41        | 9.78        | 11                       | 77         | M             |
| 26               | 5.25         | 3.41        | 15.76       | 18                       | 81         | M             |
| 27               | 0.95         | 0.43        | 5.8         | 19                       | 52         | M             |
| 28               | 2.03         | 4.31        | 12.67       | 20                       | 69         | F             |
| 29               | 4.02         | 7.21        | 13.45       | >24                      | 49         | F             |
| 30               | 11.44        | 5.44        | 20.44       | 3                        | 58         | M             |
| 31               | 3.01         | 12.1        | 12.81       | 15                       | 72         | M             |
| 32               | 9.01         | 3.49        | 17.54       | 9                        | 54         | F             |
| 33               | 1.12         | 0.21        | 4.49        | 19                       | 65         | M             |
| 34               | 20.71        | 3.21        | 23.89       | 5                        | 80         | M             |
